# Supplementary material for: The Combined Cultivation of Feruloyl Esterase-Producing Strains with CMCase and Xylanase-Producing Strains Increases the Release of Ferulic Acid
Source: MDPI journal article supplement (doi:10.3390/microorganisms10101889), 2022-09-22
Supplement: s1 [file s1]

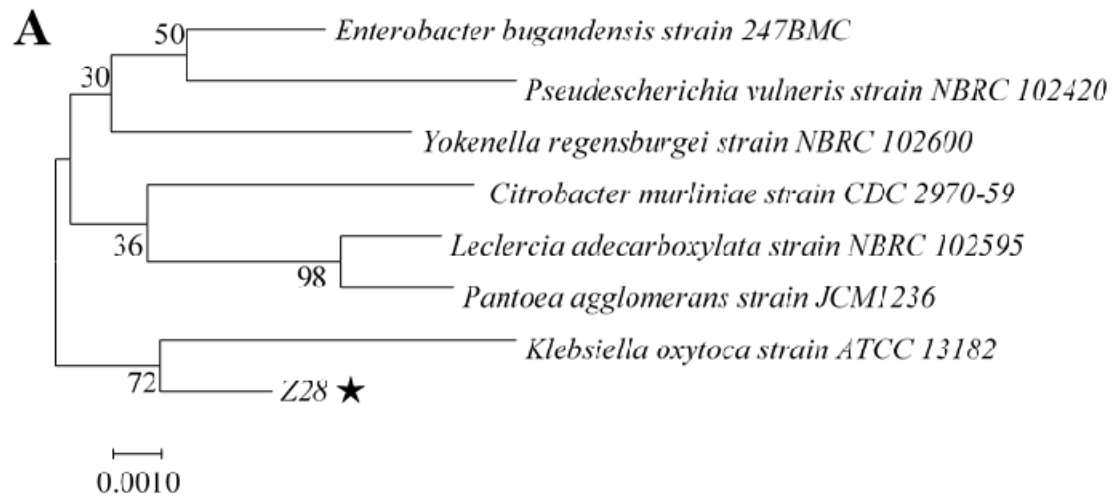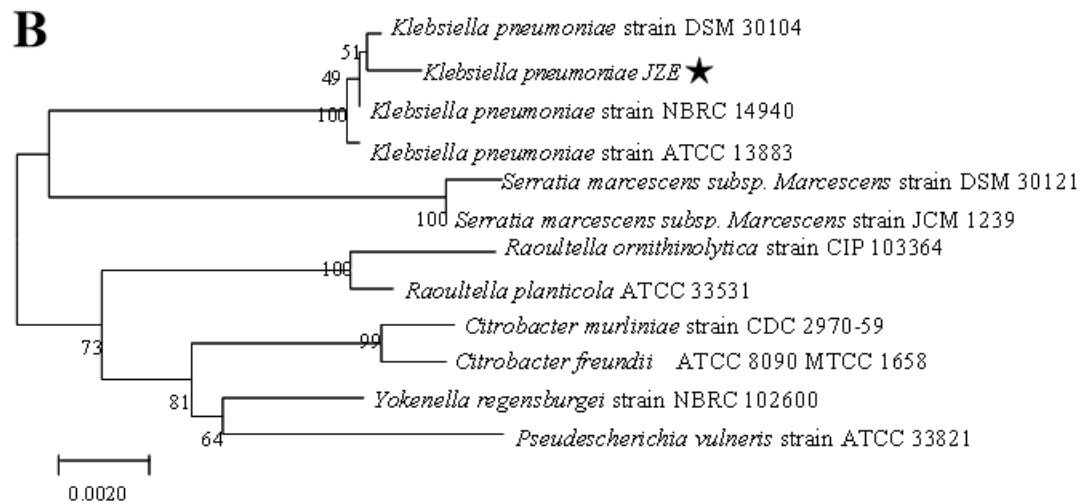

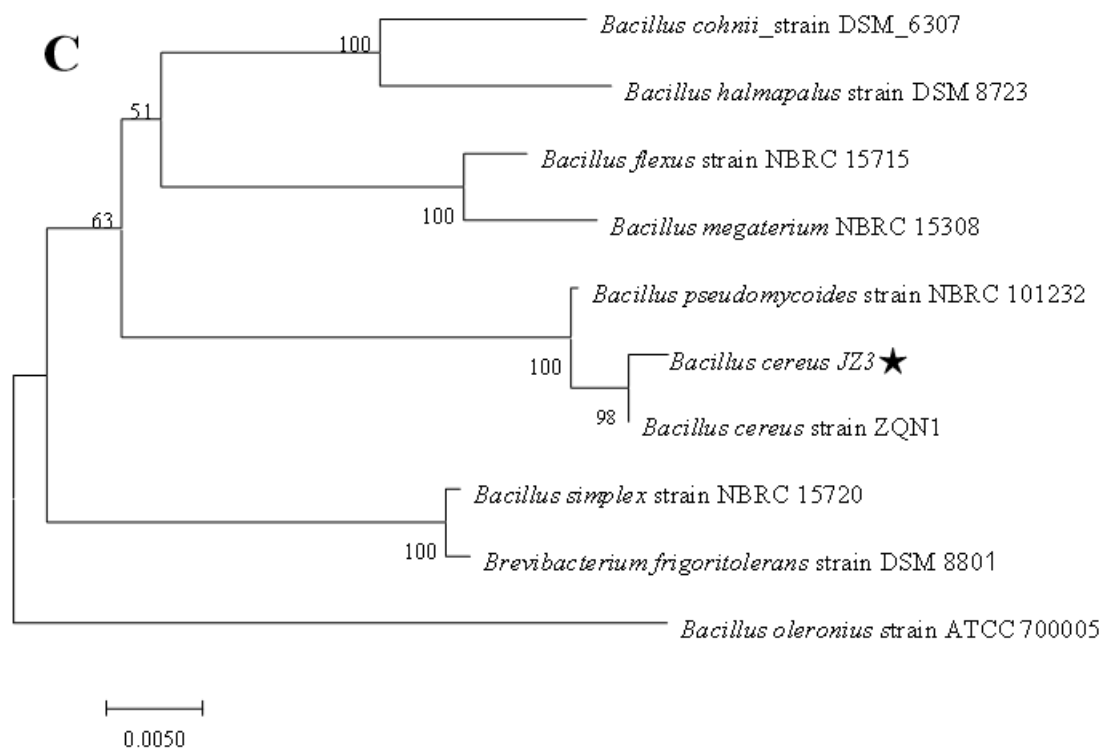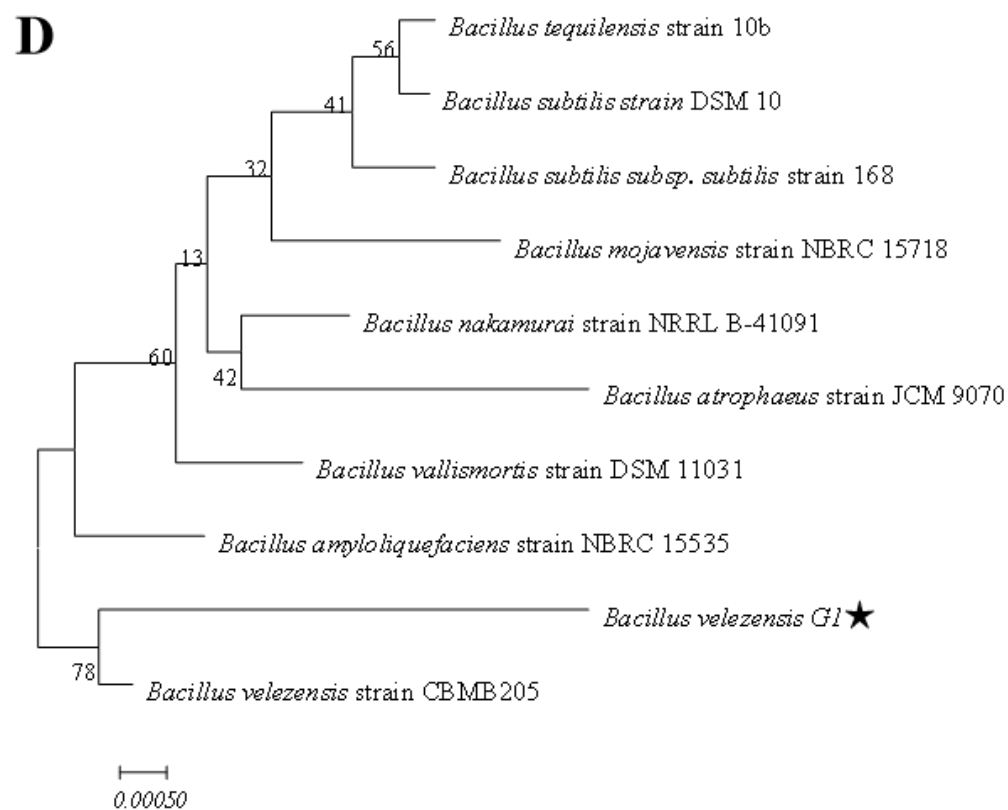

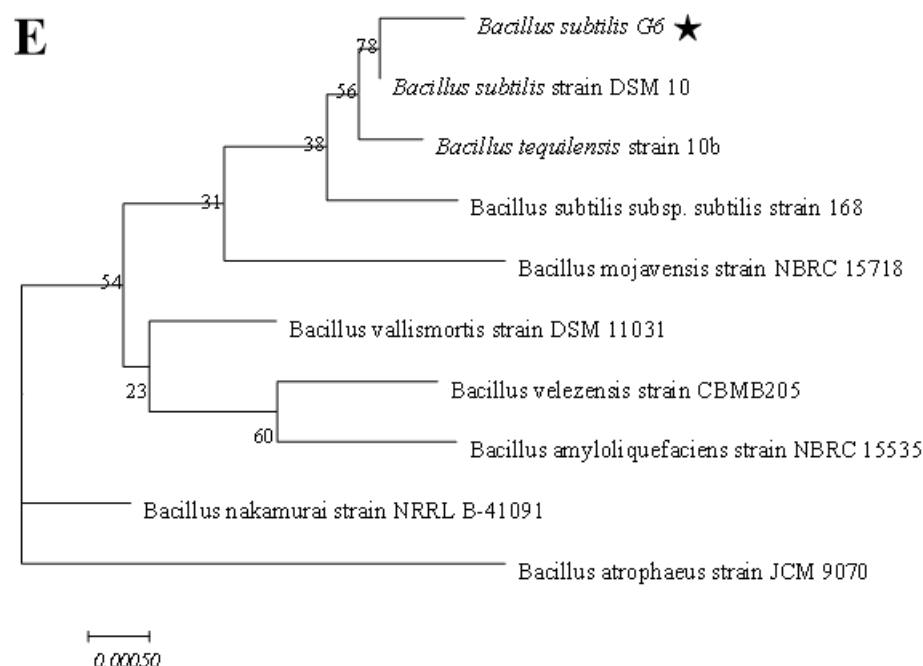

Figure S1. Identification of Feruloyl Esterase-producing strains(A) with and Xyl anase-producing Strains(B-C), CMCase-producing Strains(D-E) by 16SrRNA sequencing after constructing the phylogenetic tree using the Neighbor-joining method at 500 replicates of bootstrap value

Table S1. Published microorganism using alignments in the work

| strain                           | References |
|----------------------------------|------------|
| <i>Klebsiella pneumoniae</i> JZE | 1          |
| <i>Siccibacter colletis</i> G2   | 2          |

## References

1. Yao Zhang , J., Xian Zhang ,Zhiping Feng, Lijuan Yang, Screening ofAlkaline Tolerant Xylanase Strains in Bamboo Rat Intestines and Study on Enzymatic Properties. *Science and Technology of Food Industry* **2021**,

42 (23), 118-125.

2. Wei Guo, Y. Z., Xian Zhang, Lijuan Yang, Screening of acid cellulase strain degradation resistance in bamboo rats and study on enzymatic properties. *Feed Research* **2021**, 44 (17), 65-69.
